# Supplementary material for: Understanding current research activity, research culture perceptions and research aspirations in an NHS community healthcare organisation: A mixed methods evaluation
Source: Research Square preprint supplement (doi:10.21203/rs.3.rs-6727682/v1), 2025-07-31
Supplement: Supplementary file 1 [file 1f9483c0b50e3e1d32e2cb86.docx]

**Additional File 7. Consultation participation**

| Consultation participants | |
| --- | --- |
| Senior Trust Leaders invited 29 | Participants n = 21 ( 72%)  Specialist Business Unit = 5;  Adult Business Unit = 3;  Children’s Business Unit = 7;  Other = 6 (Corporate Services) |
| Service-level managers invited 46 | Participants n =34 (74%)  Service-level managers from a range of community services including children’s, adult community, rehab, self-management, long-term conditions, musculoskeletal and pain, mental health, speech and language, podiatry, dental, continence, police custody, liaison and diversion and homeless services. |
| Research-interested staff invited 76 | Participants n = 9 |
