# Supplementary material for: Understanding current research activity, research culture perceptions and research aspirations in an NHS community healthcare organisation: A mixed methods evaluation
Source: Research Square preprint supplement (doi:10.21203/rs.3.rs-6727682/v1), 2025-07-31
Supplement: Supplementary file 2 [file 275fd81c51d532b64312013f.docx]

**Additional File 6. Key themes from responses to free-text survey questions**

| **Theme and associated survey question**  **Senior Trust Leadership participants** | | **Theme and associated survey question**  **Service-level manager participants** | |
| --- | --- | --- | --- |
| **Research Leadership** | | | |
| Who is designated research lead with formal responsibility for overseeing research activity within your Business Unit / Department? | - No-one identified x 6 - Clinical leads x 2 - Senior leadership team x 1 - Trust research team x 4 - No response x 1 | Who has formal responsibility for oversight of research in your service? | - Heads of service/ business units x 6 - No-one identified x 2 - Individual clinical academic x 3 - Trust level research team x 2 - No responses x 10 |
| **Research Activity** | | | |
| Which services / teams within your Business Unit / Department have conducted or supported research studies over the last 5 years? | - Able to name some services involved in research x 8 - Not able to name any research - active services = 4 - Responded NA = 1 | What research activity has your service supported over the last 5 years? | - Aware of some research activity (delivery ; or fellowships) x 9 - Unsure x 5 - 4 mentioned quality improvement projects/ supporting masters level study x 4 |
| **Research Outputs** | | | |
| How many staff in your Business Unit / Department have published research or presented research at conferences over the last 5 years and how has this been celebrated? | - Aware of publications/ conference presentations x 4 - Not aware of outputs x 5 - No response x 5 | How many people in your service have presented research at conferences in the last 5 years? | - Aware of 1-5 outputs x 10 - Aware of more than 5 outputs x 1 - Not aware of any outputs x 10 - No response x 3 |
| **Motivators and Benefits** | | | |
| What have been the benefits and positive impacts of any of the research activity described? | - Changes/ improvements in clinical practice x 4 - Staff development and engagement x 4 - None recognised x 2 - No response x 4 | What are the biggest motivators for research in your service? | - Drive more effective/ safe, efficient and high-quality evidence-based patient care x 16 - Staff motivation/career development and retention x 11 - Reputation of the team x 3 - Improves equality and diversity x 2 - No response x 6 |
| **Barriers and Challenges** | | | |
| What have been the challenges and negative impacts of any of the research activity described? | - Lack of resource/time/ funding and prioritising clinical work x 4 - Lack of confidence/ awareness/ opportunities/ - skills/ peer support x 1 - None x 3 - No response x 4 | What are the biggest barriers to research in your service? | - Lack of resource/time/ funding and prioritising clinical work x 20 - Lack of knowledge/ expertise/training/awareness/ opportunities x 5 - Lack of interest/ motivation/leadership x 4 - No response = 4 |
