# Supplementary material for: Understanding current research activity, research culture perceptions and research aspirations in an NHS community healthcare organisation: A mixed methods evaluation
Source: Research Square preprint supplement (doi:10.21203/rs.3.rs-6727682/v1), 2025-07-31
Supplement: Supplementary file 3 [file 415adac4bea2ed577949a8b1.docx]

**Additional File 2. Survey participation**

| **Survey Participant Group** | **Survey participants** | |
| --- | --- | --- |
| **Senior Trust Leaders**  (29 target participants) | **Participants n = 14 (48%)**  Specialist Business Unit = 5  Adult Business Unit = 3  Children’s Business Unit = 1  Other = 5 (corporate/medical) | |
| **Service-level managers**  (46 target participants) | **Participants n =25 (54%)**  Specialist Business Unit = 14  Adult Business Unit = 4  Children’s Business Unit = 7 | |
| **Healthcare and support staff** (approximately 3,000 staff) | **Participants n = 74 ( 2.5%)**  Specialist Business Unit = 45  Adult Business Unit = 12  Children’s Business Unit = 12  Other = 5 (corporate/ medical) | admin and support staff = 3  non-registered healthcare staff = 5  registered healthcare staff = 29  advanced/consultant-level staff = 30  corporate/leadership staff = 8 |
