# Supplementary material for: Understanding current research activity, research culture perceptions and research aspirations in an NHS community healthcare organisation: A mixed methods evaluation
Source: Research Square preprint supplement (doi:10.21203/rs.3.rs-6727682/v1), 2025-07-31
Supplement: Supplementary file 4 [file 8c5f0e12c0d6b91280ab325f.docx]

**Additional File 3. Survey response summary for SCORR tool items**

| **Senior Trust leaders’ responses (n = 14)** | | | **Clinical and non-clinical healthcare staff self-rating responses (n = 75)** | | |
| --- | --- | --- | --- | --- | --- |
| Staff Categories | Median (IQR) perceived current level of each staff group (scale 1-5) | Median (IQR) aspired-to level in 5 yrs of each staff group (scale 1-5) | Staff Categories | Median (IQR) perceived current level (scale 1-5) | Median (IQR) aspired-to level in 5 yrs (scale 1-5) |
| Leadership and management staff | 2.5 (1.0) | 4.0 (2.0) | Leadership and management staff (n = 8) | 2.5 (1.8) | 4.0 (1.8) |
| Registered practitioners (band 6 and below) | 2.0 (0.0) | 4.0 (1.0) | Registered practitioners (band 6 and below) (n = 29) | 2.0 (1.0) | 4.0 (2.0) |
| Advanced and consultant practitioners (band 7 and above) | 3.0 (2.0) | 5.0 (0.0) | Advanced and consultant practitioners (band 7 and above) (n = 30) | 3.0 (2.0) | 4.0 (1.3) |
| Admin and support staff | 1.0 (0.0) | 2.0 (1.0) | Admin and support staff (n = 2) | 3.0 (N/A) | 3.5 (N/A) |
| Non-registered healthcare staff | 1.0 (0.0) | 2.0 (1.0) | Non-registered healthcare staff (n = 5) | 2.0 (0.8) | 3.0 (2.8) |
| Overall Median ratings | 2.0 (2.0) | 4.0 (2.3) | Overall Median ratings | 2.0 (1.0) | 4.0 (2.0) |

*SCORR =* Skills, Capability, and Organisational Research Readiness; *IQR = Interquartile range*
