# Supplementary material for: Understanding current research activity, research culture perceptions and research aspirations in an NHS community healthcare organisation: A mixed methods evaluation
Source: Research Square preprint supplement (doi:10.21203/rs.3.rs-6727682/v1), 2025-07-31
Supplement: Supplementary file 5 [file adbc485bc7ac1bad909b5899.docx]

**Additional File 4. Survey responses for RCC Tool items – overall, by staff group, by business unit**

| **Questionnaire responses n = 39** | | | | | | | |  |  |  |  |  |  |  |  |  |  |  |  |  |  |  |
| --- | --- | --- | --- | --- | --- | --- | --- | --- | --- | --- | --- | --- | --- | --- | --- | --- | --- | --- | --- | --- | --- | --- |
| Organisation level RCC items | The Trust has adequate resources to support staff research training | The Trust has funds, equipment or admin to support research activities | The Trust has a plan or policy for research development | The Trust has senior managers that support research | The Trust ensures staff career pathways are available in research | The Trust ensures organisation planning is guided by evidence | The Trust has consumers / patients / service users involved in research | The Trust accesses external funding for research | The Trust encourages research activities relevant to practice | The Trust has software programs for analysing research data | The Trust has mechanisms to monitor research quality | The Trust has identified experts accessible for research advice | The Trust supports a multi-disciplinary approach to research | The Trust has regular forums / bulletins / conferences to present research findings | The Trust engages external partners (eg universities) in research | The Trust supports applications for research scholarships / fellowships or degrees (PhD, MRes, MSc) | The Trust supports the peer-reviewed publication of research | The Trust promotes clinical practice based on evidence |  |  | Overall mean |  |
| Team level RCC items | My service has adequate resources to support staff research training | My service has funds, equipment or admin to support research activities | My service does planning for research development as a team | My service has team leaders that support research | My service provides opportunities to get involved in research | My service does planning (clinical or operational) that is guided by evidence | My service has consumer/patient involvement in research activities/planning | My service has applied for external funding for research | My service conducts research activities relevant to practice | My service has software available to support research activities | My service has mechanisms to monitor research quality | My service has identified experts accessible for research advice | My service supports a multi-disciplinary approach to research | My service disseminates research results at research forums/seminars (conferences) | My service has external partners (eg universities) engaged in research | My service supports applications for research scholarships/fellowships or degrees (PhD/MRES/MSc) | My service supports the peer-reviewed publication of research |  | My service ensures staff involvement in developing the research plan | My service has incentives & support for research mentoring activities |  |
| **Overall Analysis of RCC scores (organisation-level from senior Trust leaders and team-level from Service-level managers)** | | | | | | | | | | | | | | | | | | | | | |  |
| **Overall MEDIAN (n = 39)** | **5.0** | **3.0** | **3.0** | **7.0** | **5.0** | **7.0** | **3.5** | **4.0** | **6.0** | **3.0** | **4.0** | **6.0** | **7.0** | **4.0** | **6.5** | **6.0** | **6.0** | **8.0** | **2.0** | **2.0** | **5.1** |  |
| IQR | 3.0 | 3.0 | 5.5 | 2.3 | 4.0 | 2.0 | 5.0 | 6.0 | 3.0 | 4.0 | 5.5 | 5.8 | 4.0 | 3.5 | 4.0 | 5.0 | 3.5 | 2.3 | 3.0 | 4.0 | 2.9 |  |
|  |  |  |  |  |  |  |  |  |  |  |  |  |  |  |  |  |  |  |  |  |  |  |
| **RCC Analysis by staff group: senior Trust leaders (organisation-level items) and service-level managers (team level items)** | | | | | | | | | | | | | | | | | | | | | |  |
| **Senior Trust leaders (n= 14) Organisation-level items** | 6.0 | 5.0 | 7.5 | 7.5 | 5.0 | 7.0 | 6.0 | 7.0 | 6.0 | 5.0 | 5.5 | 7.5 | 7.0 | 5.0 | 6.5 | 6.5 | 7.0 | 8.0 |  |  | **6.3** |  |
| IQR | 1.5 | 2.0 | 2.3 | 2.0 | 4.3 | 2.3 | 3.0 | 2.5 | 2.0 | 4.5 | 4.0 | 3.0 | 3.0 | 2.0 | 2.5 | 2.3 | 1.5 | 2.3 |  |  | 1.5 |  |
|  |  |  |  |  |  |  |  |  |  |  |  |  |  |  |  |  |  |  |  |  |  |  |
| **Service-level managers (n=25) Team-level items** | 3.0 | 2.5 | 2.0 | 7.0 | 5.0 | 7.0 | 2.5 | 2.0 | 5.0 | 2.0 | 2.0 | 5.5 | 6.0 | 4.0 | 6.5 | 4.5 | 5.0 |  | 2.0 | 2.0 | **4.3** |  |
| IQR | 3.3 | 1.0 | 2.0 | 4.0 | 4.0 | 1.8 | 3.8 | 6.0 | 4.5 | 2.0 | 5.0 | 6.3 | 5.5 | 4.0 | 5.8 | 6.0 | 6.0 |  | 3.0 | 4.0 | 2.5 |  |
|  |  |  |  |  |  |  |  |  |  |  |  |  |  |  |  |  |  |  |  |  |  |  |
| **RCC Analysis by business unit** | | | | | | | | | | | | | | | | | | | | | |  |
| **Specialist services business unit (n = 19)** | 4.0 | 2.5 | 2.0 | 8.0 | 5.0 | 7.0 | 3.0 | 5.0 | 6.0 | 2.0 | 2.0 | 6.0 | 7.0 | 4.5 | 6.0 | 6.0 | 6.5 | 8.0 | 2.0 | 3.5 | **5.1** |  |
| IQR | 4.0 | 3.0 | 3.0 | 2.3 | 5.3 | 1.3 | 5.3 | 8.0 | 2.0 | 4.0 | 4.0 | 7.0 | 3.5 | 4.0 | 6.0 | 6.0 | 5.3 | 3.0 | 4.8 | 4.5 | 3.0 |  |
|  |  |  |  |  |  |  |  |  |  |  |  |  |  |  |  |  |  |  |  |  |  |  |
| **Adult services business unit (n = 7)** | 5.0 | 3.5 | 3.0 | 8.0 | 5.0 | 7.0 | 6.0 | 2.0 | 5.5 | 3.0 | 6.5 | 7.5 | 5.5 | 5.0 | 7.0 | 6.0 | 5.0 | 9.0 | 2.0 | 2.0 | **4.3** |  |
| IQR | 3.0 | 3.8 | 6.0 | 4.0 | 4.0 | 1.0 | 6.0 | 6.0 | 5.5 | 5.0 | 4.0 | 4.3 | 4.0 | 3.8 | 2.0 | 4.8 | 3.3 | 3.0 | 2.8 | 2.0 | 3.0 |  |
|  |  |  |  |  |  |  |  |  |  |  |  |  |  |  |  |  |  |  |  |  |  |  |
| **Children’s services business unit (n = 7)** | 4.5 | 3.0 | 3.0 | 7.0 | 6.5 | 7.5 | 3.0 | 2.5 | 6.0 | 1.5 | 6.0 | 6.0 | 5.0 | 5.0 | 7.0 | 7.0 | 6.0 | 8.0 | 2.0 | 1.0 | **5.0** |  |
| IQR | 4.5 | 3.0 | 4.0 | 3.5 | 3.5 | 3.5 | 4.8 | 4.5 | 4.0 | 2.5 | 6.0 | 4.5 | 5.0 | 5.5 | 5.0 | 6.0 | 6.0 |  | 6.0 | 2.8 | 3.3 |  |
|  |  |  |  |  |  |  |  |  |  |  |  |  |  |  |  |  |  |  |  |  |  |  |
| **Corporate/ other services** | 5.0 | 5.0 | 8.0 | 6.0 | 3.0 | 5.0 | 4.0 | 7.0 | 6.0 | 5.0 | 3.0 | 7.0 | 7.0 | 4.0 | 6.0 | 6.0 | 7.0 | 7.0 |  |  | **5.7** |  |
| IQR | 2.0 | 2.0 | 1.0 | 1.0 | 2.5 | 2.0 | 3.0 | 5.0 | 2.0 | 5.5 | 3.5 | 3.5 | 4.0 | 2.0 | 4.0 | 3.0 | 1.5 | 2.0 |  |  | 2.1 |  |
| All scores are Median with Interquartile Range (IQR);  RCC = Research Capacity and Culture | | | | | | |  |  |  |  |  |  |  |  |  |  |  |  |  |  |  |  |
