# Supplementary material for: Understanding current research activity, research culture perceptions and research aspirations in an NHS community healthcare organisation: A mixed methods evaluation
Source: Research Square preprint supplement (doi:10.21203/rs.3.rs-6727682/v1), 2025-07-31
Supplement: Supplementary file 6 [file e8d757239bf9d546e252b69e.docx]

**Additional File 1. Consultation Discussion Topics**

1. Research activities/ opportunities in your service/ business unit/ organisation
2. Impacts/ potential impacts of research activity on your service/business unit/ organisation
3. Reasons behind the responses in the survey (focus on high/ low scores)
4. Current strategy within your service/ business unit/ organisation for engaging in research (for example how the scenarios below might be managed currently)
5. Future vision for research engagement and support needed to work towards this

*Potential scenarios for discussion*

- *You have an enthusiastic staff member keen to be involved in research*
- *You have a clinical question with limited/ no evidence where research is needed*
- *Your team has clinical data that might help provide useful evidence to inform future practice/ practice elsewhere*
- *A research team approached your service for research recruitment/ delivery to a study that is relevant to your patients and clinical practice*
- *If time/money/staff etc was no object – what would your team love to research? What question or problem would you like to answer/solve?*
