# Supplementary material for: Understanding current research activity, research culture perceptions and research aspirations in an NHS community healthcare organisation: A mixed methods evaluation
Source: Research Square preprint supplement (doi:10.21203/rs.3.rs-6727682/v1), 2025-07-31
Supplement: Supplementary file 7 [file ee39971cb0e242a4f219f0fa.docx]

**Additional File 5. Survey responses for SCORR Tool items: self-ratings overall, by staff group, by profession, by business unit; and senior Trust leadership ratings for different staff levels**

| **SCORR tool self-ratings** | **current** | **5 year aspiration** |  |
| --- | --- | --- | --- |
|  |  |  |  |
| **Overall SCORR self-ratings** | | |  |
| Overall Mean ratings | 2.6 | 3.8 |  |
| **Overall Median ratings** | **2.0** | **4.0** |  |
| Interquartile range | 1.0 | 2.0 |  |
|  |  |  |  |
| **SCORR self-ratings by staff group** | | |  |
| Senior Leadership Mean ratings | 2.9 | 3.8 |  |
| **Senior Leadership Median ratings** | **2.5** | **4.0** |  |
| Interquartile range | 1.8 | 1.8 |  |
|  |  |  |  |
| Non-registered Healthcare Staff Mean ratings | 2.3 | 3.3 |  |
| **Non-registered healthcare staff Median ratings** | **2.0** | **3.0** |  |
| Interquartile range | 0.8 | 2.8 |  |
|  |  |  |  |
| Administrator Mean ratings | 3.0 | 3.5 |  |
| **Administrator Median ratings (n = 2)** | **3.0** | **3.5** |  |
| Interquartile range | N/A | N/A |  |
|  |  |  |  |
| Registered Healthcare Practitioners Mean ratings | 2.2 | 3.6 |  |
| **Registered Healthcare Practitioners Median ratings** | **2.0** | **4.0** |  |
| Interquartile range | 1.0 | 2.0 |  |
|  |  |  |  |
| Advanced and Consultant level Healthcare Practitioners Mean ratings | 2.8 | 4.1 |  |
| **Advanced and Consultant level Healthcare Practitioners Median ratings** | **3.0** | **4.0** |  |
| Interquartile range | 2.0 | 1.3 |  |
|  |  |  |  |
|  |  |  |  |
| **SCORR self-ratings by professional group** | | |  |
| AHP Mean ratings | 2.4 | 3.9 |  |
| **AHP Median ratings** | **2.0** | **4.0** |  |
| Interquartile range | 1.0 | 2.0 |  |
|  |  |  |  |
| Nurse Mean ratings | 2.5 | 3.3 |  |
| **Nurse Median ratings** | **3.0** | **4.0** |  |
| Interquartile range | 1.0 | 3.0 |  |
|  |  |  |  |
| Doctors, Dentists, Clinical scientists Mean ratings | 3.1 | 4.5 |  |
| **Doctors, Dentists, Clinical Scientists Median ratings** | **3.0** | **4.5** |  |
| Interquartile range | 1.0 | 1.0 |  |
|  |  |  |  |
|  |  |  |  |
| **SCORR self-ratings by business unit** | | |  |
| Specialist services Business Unit Mean ratings | 2.5 | 3.7 |  |
| **Specialist services Business Unit Median ratings n = 45** | **2.0** | **4.0** |  |
| Interquartile range | 1.0 | 2.0 |  |
|  |  |  |  |
| Adult services Business Unit Mean ratings | 3.0 | 4.3 |  |
| **Adult services Business Unit Median ratings** | **3.0** | **5.0** |  |
| Interquartile range | 0.8 | 1.0 |  |
|  |  |  |  |
| Children’s services Business Unit Mean ratings | 2.3 | 3.6 |  |
| **Children’s services Business Unit Median ratings** | **2.0** | **4.0** |  |
| Interquartile range | 0.8 | 2.5 |  |
|  |  |  |  |
| Corporate team Mean ratings | 3.2 | 3.6 |  |
| **Corporate team Median ratings** | **3.0** | **4.0** |  |
| Interquartile range | 2.5 | 3.0 |  |

| **Senior Trust leadership mean SCORR ratings for different staff groups** | | | | | | | | | | |
| --- | --- | --- | --- | --- | --- | --- | --- | --- | --- | --- |
|  | Current Advanced Practice/ Consultant level | 5 year aspiration for Advanced Practice/  Consultant level | Current registered Health Care Practitioner (HCP) level | 5 year aspiration for registered HCP level | Current non-registered Healthcare staff level | 5 year aspiration for non-registered Healthcare staff level | Current Administrative/ support staff level | 5 year aspiration for Administrative/ support staff level | Current Leadership and management level | 5 year aspiration for Leadership and management level |
| Senior Trust leadership mean ratings | 3.3 | 5.0 | 2.1 | 3.8 | 1.3 | 2.6 | 1.3 | 2.6 | 2.6 | 4.0 |
| **Senior Trust leaders (n = 14) median ratings** | **3.0** | **5.0** | **2.0** | **4.0** | **1.0** | **2.0** | **1.0** | **2.0** | **2.5** | **4.0** |
| Interquartile range | 2.0 | 0.0 | 0.0 | 1.0 | 0.0 | 1.0 | 0.0 | 1.0 | 1.0 | 2.0 |
|  |  |  |  |  |  |  |  |  |  |  |
| Senior leadership mean ratings across staff groups | | | | 2.1 | 3.7 |  |  |  |  |  |
| **Senior leaders (n = 14) median ratings across all staff groups** | | | | **2.0** | **4.0** |  |  |  |  |  |
| Interquartile range | | | | 2.0 | 2.3 |  |  |  |  |  |

*SCORR = Skills, Capability, and Organisational Research Readiness*
